# Supplementary material for: Determining large hyperfine interactions of a model flavoprotein in the semiquinone state by pulse-EPR techniques
Source: Copernicus journal article supplement (doi:10.5194/mr-2024-24), 2025-01-17
Supplement: Supplementary file 1 [file mr-2024-24-supplement.pdf]

## Determining large hyperfine interactions of a model flavoprotein in the semiquinone state by pulse-EPR techniques

Jesús I. Martínez<sup>1,3</sup>, Susana Frago<sup>2</sup>, Milagros Medina<sup>2</sup>, Inés García-Rubio<sup>3,4</sup>

5 <sup>1</sup>Departamento de Física de la Materia Condensada, Universidad de Zaragoza, Zaragoza, 50009, Spain

<sup>2</sup>Departamento de Bioquímica y Biología Molecular y Celular and Instituto de Biocomputación y Física de Sistemas Complejos (BIFI), Universidad de Zaragoza, Zaragoza, 50009, Spain

<sup>3</sup>Instituto de Ciencia de Materiales de Aragón, CSIC-Universidad de Zaragoza, 50009, Spain

<sup>4</sup>Institute for Molecular Physical Science, ETH Zurich, 8093 Zürich, Switzerland

10

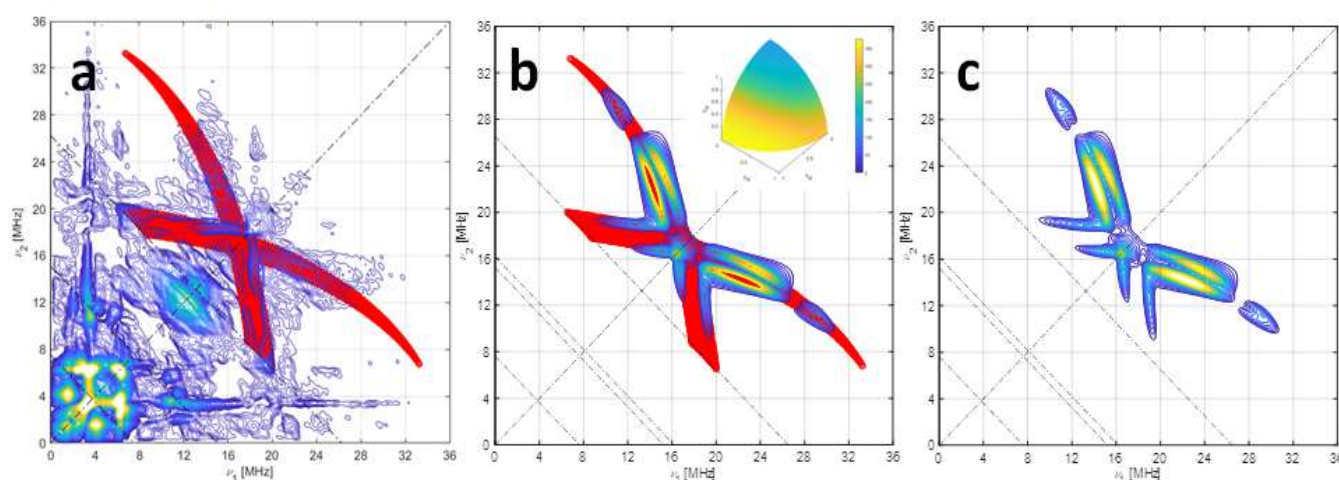

15

**Figure S.1: HYSORE of <sup>13</sup>C labelled Fld variants.** a) [<sup>13</sup>C(2,4a)-FMN]-Fld spectrum with the calculated HYSORE pattern for a <sup>13</sup>C nucleus with the parameters specified in the text superimposed in red, b) Simulated spectrum of <sup>13</sup>C(4a) using the function saffron from EasySpin. Superimposed in red, the calculated HYSORE pattern. c) Simulated spectrum of <sup>13</sup>C(4a) using the function saffron from EasySpin. The inset in the central spectrum shows the orientation selection of the experimental spectra in a sphere octave according to the colors of the accompanying scale.

20

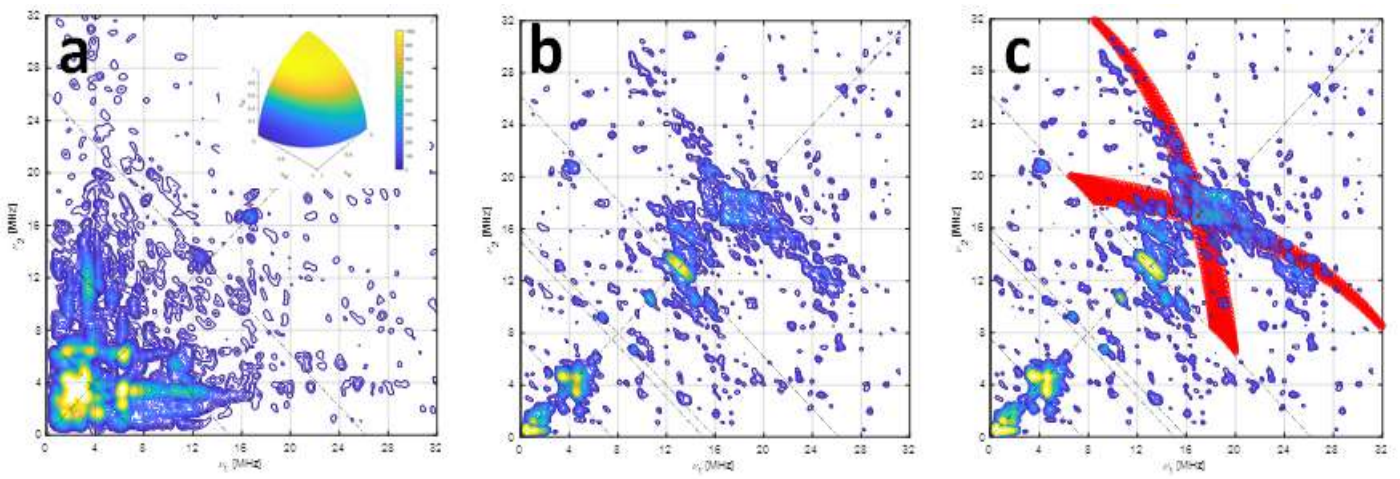

25 **Figure S.2: HYSORE of  $^{13}\text{C}$  labelled Fld variants at the low-field tail of the CW-EPR spectrum.** a) [ $^{13}\text{C}(2)$ -FMN]-Fld spectrum, b) [ $^{13}\text{C}(2,4a)$ -FMN]-Fld spectrum, c) [ $^{13}\text{C}(2,4a)$ -FMN]-Fld spectrum with the calculated HYSORE pattern for a  $^{13}\text{C}$  nucleus with the parameters specified in the text superimposed in red. Both experimental spectra were taken at the low-field tail of the CW-EPR spectrum corresponding to the loose parallel orientation selection shown in the inset of spectrum a.  $B = 1221.4$  mT,  $\tau = 124$  ns and  $T = 50$  K. Antidiagonal lines cross the diagonal at the Larmor frequencies  $\nu_{14N}$ ,  $2 \cdot \nu_{14N}$  and  $\nu_{13C}$ .

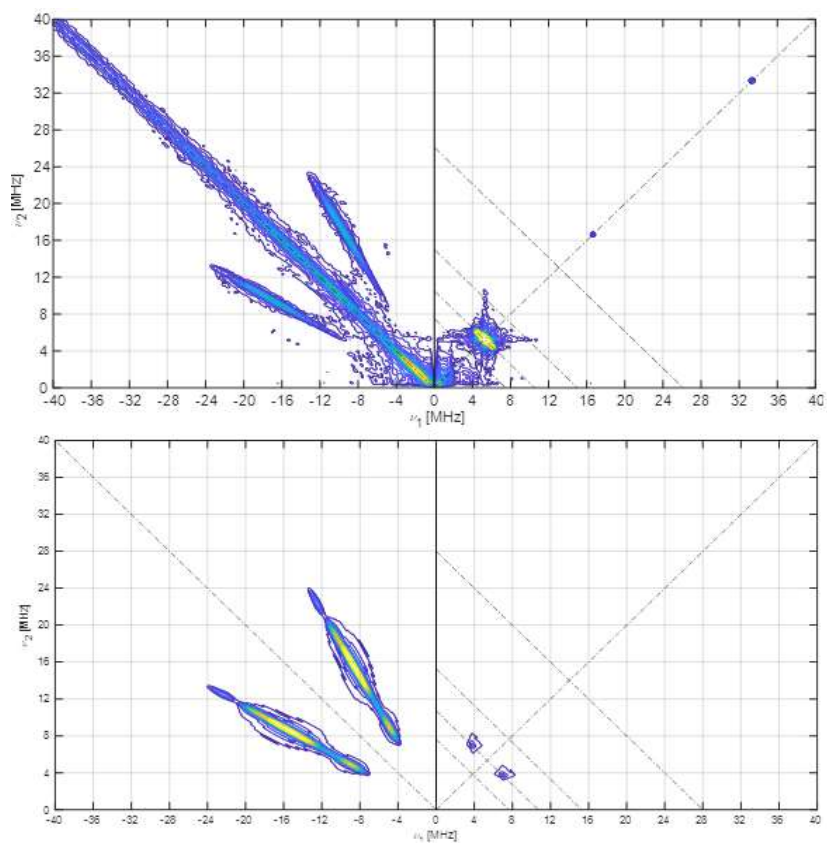

30 **Figure S.3: HYSORE simulation of [<sup>15</sup>N-FMN]-Fld variant at the high-field edge of the EPR spectrum.** a) Experimental spectrum,  $B = 1219.7$  mT, sum of  $\tau$  values of 96, 124, 144 and 168 ns. It is the same shown in Fig. 5.a of the main text but is depicted also here for comparative purposes. b) Simulation for the same experimental conditions using the parameters specified in the text and in Table 1. The anti-diagonal line at the Larmor frequency  $\nu_{15N}$  has been included for reference.

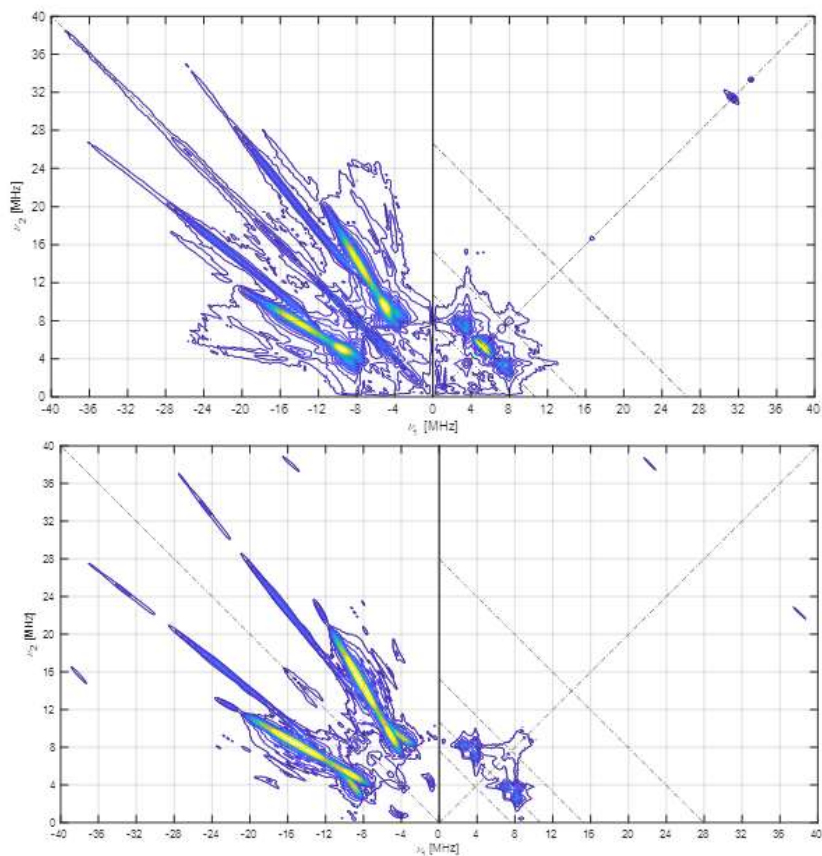

40 **Figure S.4: HYSORE simulation of  $[^{15}\text{N-FMN}]$ -Fld variant at the high-field edge of the EPR spectrum.** a) Experimental spectrum,  $B = 1217.2$  mT, sum of  $\tau$  values of 96, 144 and 168 ns. It is the same shown in Fig. 5.b of the main text but is depicted also here for comparative purposes. b) Simulation for the same experimental conditions using the parameters specified in the text and in Table 1. The antidiagonal line at the Larmor frequency  $\nu_{^{15}\text{N}}$  has been included for reference.

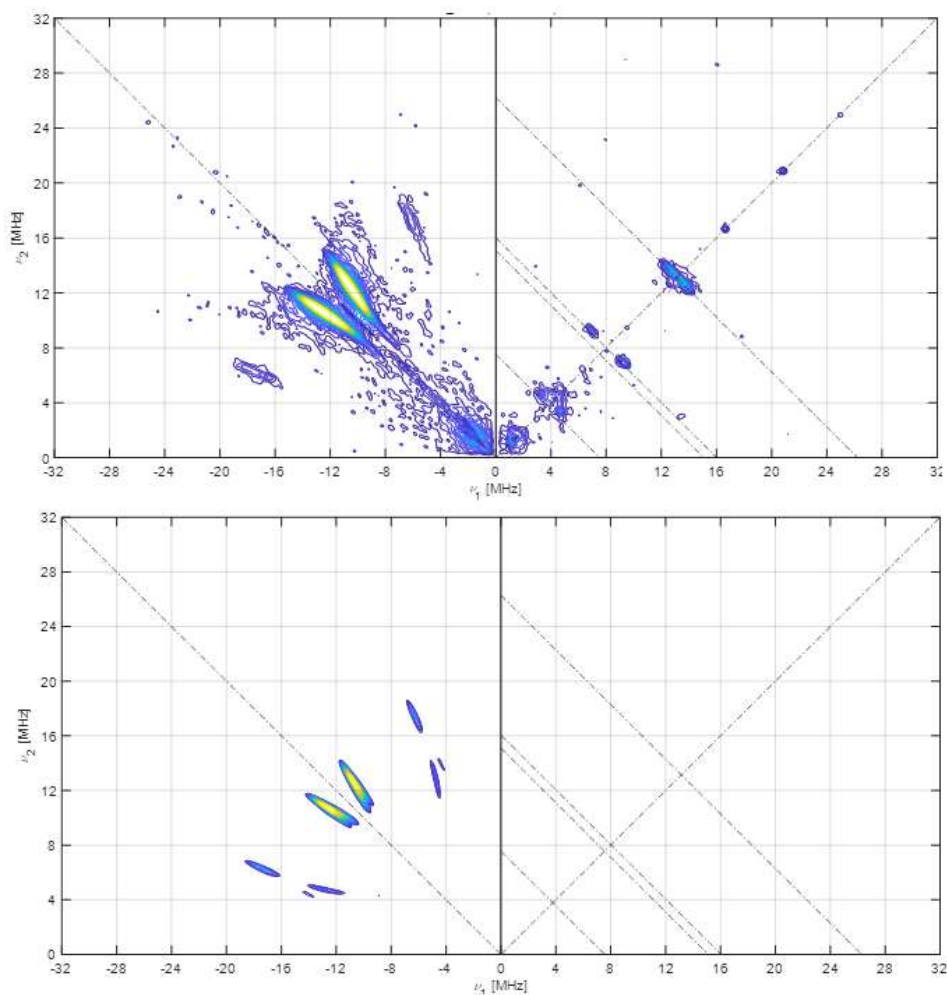

45 **Figure S.5: HSCORE simulation of  $^{14}\text{N}$  in  $^{13}\text{C}(2)\text{-FMN}$ -Fld at the low-field edge of the EPR spectrum.** a) Experimental spectrum,  $B = 1225.0$  mT, sum of  $\tau$  values of 96, 112, 128, 144 and 176 ns. It is the same shown in Fig. 6.a of the main text but is depicted also here for comparative purposes. b) Simulation for the same experimental conditions using the parameters specified in the text and in Table 1. The antidiagonal line at the Larmor frequencies  $\nu_{14\text{N}}$ ,  $2 \cdot \nu_{14\text{N}}$ ,  $\nu_{2\text{H}}$  and  $\nu_{13\text{C}}$  have been included for reference.

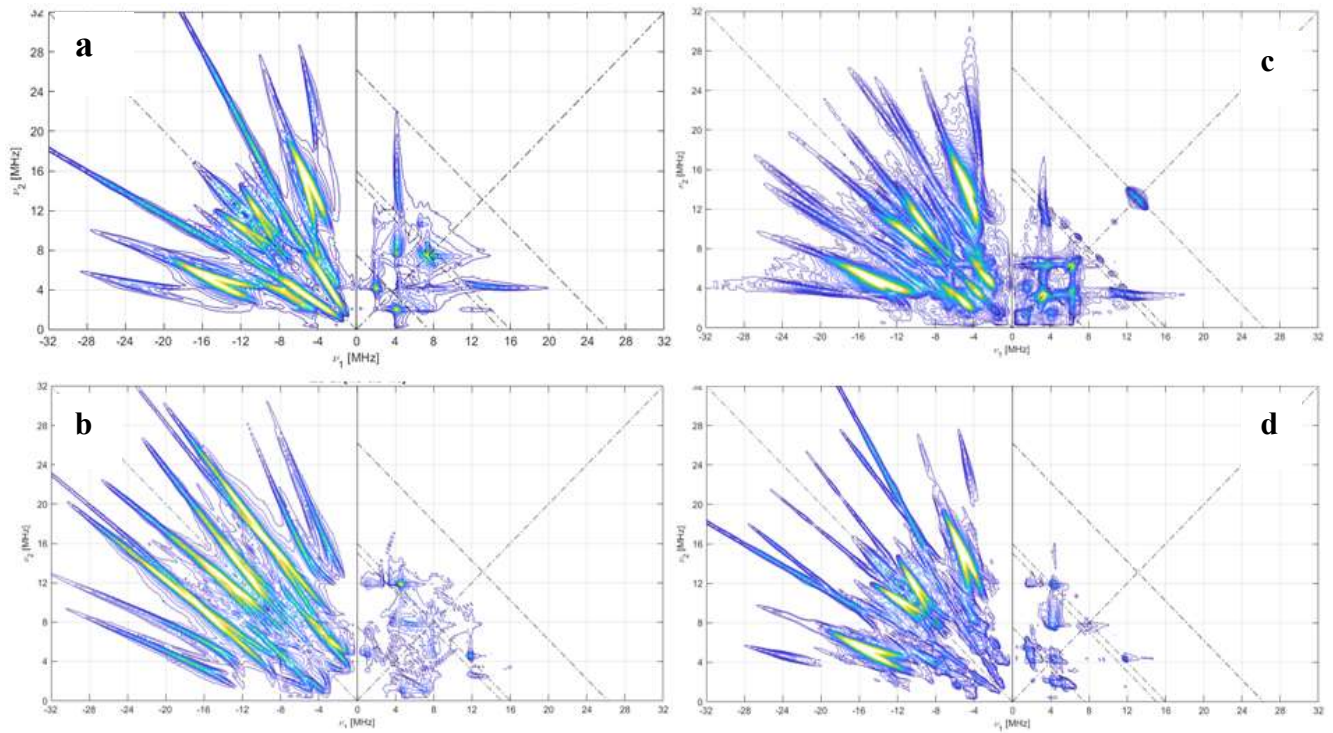

60 **Figure S.6: HSCORE simulations of  $^{14}\text{N}$  in  $^{13}\text{C}(2)\text{-FMN}$ -Fld at the center of the EPR spectrum.** a) Simulation of features associated to N(10), b) Simulation of features associated to N(5), c) Simulation of N(10) and N(5), d) Spectrum obtained from the sum of experimental spectra taken at  $\tau$  values of 96, 128 and 208 ns,  $B = 1221.0$  mT and  $T = 50$  K. The simulations have been performed using the same  $\tau$  values together with the coupling parameters specified in the text and in Table 1. The antidiagonal lines crossing the (+,+) diagonal at the Larmor frequencies  $\nu_{14\text{N}}$ ,  $2 \cdot \nu_{14\text{N}}$ ,  $\nu_{2\text{H}}$  and  $\nu_{13\text{C}}$  have been included for reference.
