# Supplementary material for: Determining large hyperfine interactions of a model flavoprotein in the semiquinone state by pulse-EPR techniques
Source: Copernicus journal article supplement (doi:10.5194/mr-2024-24), 2025-01-17
Supplement: Supplementary file [file mr-2024-24-RC2-supplement.pdf]

## Specific comments

### Materials and Methods

- Line 177: *A phase cycle of eight steps.*  
More than one 8-step phase cycling scheme has been proposed for 4-pulse HYSCORE, see e.g. DOI 10.1016/0022-2364(90)90181-8 and DOI 10.1007/s00723-008-0140-6.  
It would be beneficial to highlight which one was used and add the corresponding reference.
- Lines 183-184: *The pulse lengths were 1  $\mu$ s for the first variable mw frequency ( $mw_2$ ) [...].*
  - What was the amplitude of the HTA pulse  $\omega_{\text{HTA}}$  measured at the observer frequency ( $mw_1$ )?
  - Was such a short HTA pulse used indeed?
- Line 207: which specific reference was used for the listed  $g$  principal values?

### ELDOR-detected NMR

- Line 261: the text mentions the variation of the *spin echo* intensity, however FID-detected EDNMR has been used for this work.
- Lines 261-262: *is detected by a decrement on the spin echo generated by the detection sequence at a variable frequency when it hits an allowed EPR transition.*
  - It may be better to rewrite this sentence as it seems as if the observer frequency  $mw_1$  were swept during the experiment.
  - Also line 263: *are obtained when plotting the echo intensity as a function of the detection frequency (ELDOR frequency);* this is not in agreement with what is stated in 2.2.3, *first pulse with variable frequency ( $mw_2$ ) [...] second pulse with fixed mw frequency  $mw_1$ .*
- Line 269: *Q-band ELDOR-detected NMR is especially suitable for detecting nuclear frequencies of  $^{13}\text{C}(4a)$ .*
  - Some clarification of why this is the case would be beneficial, especially considering the resolution limitations of EDNMR compared to ENDOR.
  - Related to this point, according to the cited references for the spectrometer (Gromov *et al.*, 2001) and the microwave resonator (Tschaggelar *et al.*, 2009) the used equipment should be capable of performing ENDOR measurements. Was there a specific reason to choose EDNMR over Davies ENDOR? Was Davies ENDOR attempted on the studied system?
- Figure 3:
  - The EDNMR spectra are strongly asymmetric. This may impact the quality of the subtraction. How was the experiment set up? Where was the detection frequency placed within the resonator mode?
  - Panel a: the signals at 11 MHz appear in the spectra of both [ $^{13}\text{C}(2)$ -FMN]-Fld and [ $^{13}\text{C}(2,4a)$ -FMN]-Fld.  
Is the presence of a signal at 11 MHz in the subtraction spectrum an artefact caused by different acquisition conditions (e.g., different  $\omega_{\text{HTA}}$  field strength, resonator bandwidth, position of the pulses in the resonator mode) between the two experiments?
  - Related to the comment about the *Materials and Methods* section, is the width of the central blind spot compatible with a 1  $\mu$ s HTA pulse?

- The x-axis of both panels reads *ELDOR frequency (MHz)*.  
This nomenclature may be misleading: the spectra are displayed against the frequency difference between the HTA pulse and the detection frequency; the frequency of the ELDOR source should be in the ~34 GHz range.
- Line 283 (legend): *which yields no orientation selection*. The figure inset shows indeed some orientation selection; it may be better to use a milder statement, e.g. “negligible” or “weak”.
- Line 285 (legend): how were the orientation selection spheres obtained? Which spin Hamiltonian was used? Which pulse excitation bandwidth?
- Line 289:  $2\nu_L(^{13}\text{C}) = 13.1 \text{ MHz}$ .  $\nu_L(^{13}\text{C})$  at the chosen magnetic field should be ~13.11 MHz, hence  $2\nu_L(^{13}\text{C})$  is ~26 MHz.
- Line 294: *The difference between the frequency of the detected peaks is close to  $2\nu_L(^{13}\text{C})$ , which confirms the assignment of the peaks [...]*.  
The frequency difference between the peaks, located at  $\pm 30 \text{ MHz}$  and  $\pm 11 \text{ MHz}$ , is approximately 19 MHz.  
This value is rather far from  $2\nu_L(^{13}\text{C}) = 26 \text{ MHz}$ .
- Lines 295-297: I would consider rewriting the sentence as, in its current form, it may lack some clarity.
- Lines 300-301: it's not entirely clear to me how the edge of the outermost signal in the EDNMR spectrum could be converted directly into a value of  $|A_z|$ , especially considering that the system is in the strong-coupling case. Was equation 6,  $\nu_+ + \nu_- = |A_z|$ , used to estimate  $|A_z|$ ?
- Line 302: I agree with the observation, especially for the outermost signal.  
Were measurements performed at several  $\omega_{\text{HTA}}$  field strengths and/or different lengths of the HTA pulse to ensure the absence of additional broadening due to the choice of the experimental conditions?
- Line 305: is the notion *larger nuclear frequency* related to  $\nu_+$ ?

### <sup>13</sup>C HYSORE

- The full 2D spectra (both (++) and (-+) quadrants) for [<sup>13</sup>C(2,4a)-FMN]-Fld are displayed neither in the main text nor in the SI.
  - I find this quite surprising, especially considering that the hyperfine interaction with <sup>13</sup>C(4a) is expected to be in the strong coupling regime and should hence give signals in the (-+) quadrant as well.
  - Is the (-+) region of the mentioned spectrum devoid of any signals?
- Line 319: *Since the focus here is on the <sup>13</sup>C signals, Fig. 4 only shows the positive quadrant of the 2D measurements; see the comment above.*
- As  $I(^{13}\text{C}) = 1/2$ , it should be possible to obtain an initial estimate of  $a_{\text{iso}}$  and  $|T|$  by squaring both frequency axes, see DOI 10.1006/jmra.1995.1199.
- Line 334:  $|A_3[^{13}\text{C}(4a)]|$  is reported to be negative. Is the absolute value a typo?
- Line 334: how were the uncertainties estimated?
- Line 339 (and several other places throughout the manuscript): it would be better to have specific references to figures in the Supplementary Material.
- Figure S.1: it would be better to remind the readers of the field position at which the experiment was performed.

- Figure S.2: it would be better to display the precise location with respect to the EDFs-EPR spectrum at which the experiment was performed. Is it e.g. the same as the one in Fig. 3a or a different one?

### <sup>15</sup>N and <sup>14</sup>N HYSCORE

- Figures 5 and 6
  - Is there a specific reason for performing the field-edge <sup>15</sup>N and <sup>14</sup>N experiments on the high-field side of the spectrum rather than on the low-field side? This latter position was e.g. chosen for the EDNMR experiments (see Fig. 3a) and for the field-edge <sup>13</sup>C-HYSCORE measurement (see Fig. S2).
  - There is some conflict between the main text and the SI: according to the legend of Fig. S5, the experiment would have been performed at the low-field edge of the EPR spectrum whereas according to the corresponding Fig. 6a the measurements were performed on the high-field edge.
  - The field settings are rather different between Fig. 5a (<sup>15</sup>N) and Fig. 6a (<sup>14</sup>N). According to which criterion were the edge positions selected?
  - In the legends of Figures 5 and 6 it is mentioned that HYSCORE spectra were recorded at several  $\tau$  values and summed. How was this performed exactly? Were there major echo intensity changes between the shortest and the longest  $\tau$  values?
  - Figure 5: at least 4 dash-dot antidiagonal lines are reported. Which nuclei do these correspond to? Considering that the focus is on <sup>15</sup>N, it may be better to highlight the corresponding Larmor frequency.
  - Figures 6, S.5 and S.6: why are antidiagonal lines at the <sup>2</sup>H Larmor frequency reported? Were the samples partially deuterated?
- Lines 383-384: how were the uncertainties estimated?  
How could some rhombicity of the <sup>15</sup>N hyperfine coupling tensors be completely ruled out from the analysis of the experimental data?

### General remarks

- I couldn't find any information concerning the availability of the raw data.
- The limited resolution of the figures makes it sometimes challenging to observe the details described and discussed in the text.

## Technical corrections

- Line 98: *\*though* → *through*?
- Lines 133-134: *These results provide with a suitable protocol to experimentally access these coupling and an estimation of the spin density on the Fld model.* This sentence is not entirely clear to me.
- Line 146: *\*at al.* → *et al.*
- Line 168: although clear to a readership with magnetic resonance background, it may be better to expand the abbreviation *mw* the first time it is used.
- Line 203, equation (1): the hyperfine term does not carry the sum symbol ( $\Sigma_i$ ).
- Line 205: *\*semiquinome* → *semiquinone*.
- Line 212: *\*use to be* (subject/verb agreement).
- Line 218: *\*isoaloxacine*; here, as well as in a few other places, the term *isoalloxazine* is spelt incorrectly.
- Line 228: **4a** instead of **\*4**.
- Line 240, equation (3): the form is not consistent with equation (2) ( $A_{\parallel}(^{14}\text{N}5)$  in equation 2 vs.  $A_{\perp}(^{14}\text{N}5)$  in equation 3).
- Line 245, equation (4): for the sake of better readability, it would be better to enclose values and the related uncertainties within brackets, *i.e.*  $(8.4 \pm 0.3 \text{ mT}) - (7.1 \pm 0.3 \text{ mT})$ .
- Line 261: *\*on the* → *of the*.
- Figure 3, text between panels *a* and *b*: *\*Substraction* → Subtraction.
- Line 290: *\*regimen* → regime.
- Line 294:  $^{13}\text{C}4a$  →  $^{13}\text{C}(4a)$ .
- Line 307:  $A_{x,y}(^{13}\text{C}(4a))$  →  $A_{x,y}[^{13}\text{C}(4a)]$ .
- Line 315: *\*carried out in* → carried out on.
- Line 367: *\*performed in a* → performed on a.
- Line 372: *symmetrical with respect to the diagonal* or antidiagonal?
- Line 376: *\*HSYCORE* → HYSOCORE.
- Line 416: *\*in Q-band* → at Q-band.
- Line 416: *\*have* → has.
- Line 423: *\* both, hyperfine* → both hyperfine.
- Line 427: *\*fld* → Fld.
- Line 432: for the sake of completeness, it may be better to stress *Q-band ELDOR-detected NMR*.
- Line 435: *\*fld* → Fld.
- Line 466: *\*specific of type* → specific of the type.
- Line 467: *\*of the of the* → of the.
